# Supplementary material for: Distribution analysis of epertinib in brain metastasis of HER2-positive breast cancer by imaging mass spectrometry and prospect for antitumor activity
Source: PubMed Central journal article supplement (PMC5762859; doi:10.1038/s41598-017-18702-2), 2018-01-10

**Distribution analysis of epertinib in brain metastasis of HER2-positive breast cancer by imaging mass spectrometry and prospect for antitumor activity**

Yukari Tanaka<sup>1\*</sup>, Michinari Hirata<sup>2</sup>, Satomi Shinonome<sup>2</sup>, Mikinori Torii<sup>3</sup>, Ken-ichi Nezasa<sup>1</sup>, and Hidekazu Tanaka<sup>2</sup>

<sup>1</sup>Drug Metabolism and Pharmacokinetics, Developmental Research Laboratories, Shionogi & Co., Ltd., Toyonaka, Osaka, Japan

<sup>2</sup>Oncology and Immunology, Drug Discovery and Disease Research Laboratories, Shionogi & Co., Ltd., Toyonaka, Osaka, Japan

<sup>3</sup>Drug Safety Evaluation, Developmental Research Laboratories, Shionogi & Co., Ltd., Toyonaka, Osaka, Japan

**Supplementary information**

**Supplementary Table S1. Transcellular transport of [<sup>14</sup>C]-epertinib, across Caco-2 cell monolayers at 37°C**

| Compound                     | Concentration<br>( $\mu\text{mol/L}$ ) | $P_{\text{app}}$ ( $\times 10^{-6}$ cm/sec) |                 | $P_{\text{app}}$ ratio |
|------------------------------|----------------------------------------|---------------------------------------------|-----------------|------------------------|
|                              |                                        | Apical to basal                             | Basal to apical |                        |
| [ <sup>14</sup> C]-epertinib | 1                                      | $1.17 \pm 0.02$                             | $2.25 \pm 0.14$ | 1.9                    |
|                              | 5                                      | $1.44 \pm 0.05$                             | $1.83 \pm 0.10$ | 1.3                    |
|                              | 20                                     | $1.69 \pm 0.17$                             | $1.51 \pm 0.08$ | 0.9                    |

Each value except the values of  $P_{\text{app}}$  ratio represents the mean  $\pm$  SD of three samples.

Each value of  $P_{\text{app}}$  ratio was calculated by using the mean  $P_{\text{app}}$  value of three samples.

**Supplementary Figure S1. Experimental brain metastasis of breast cancer (intraventricular mouse model): experimental method**

Schematic showing the methodology of brain metastases development in mice, followed by drug and permeability tracer administration, and the equipment used to measure lesion permeability and distribution.

**Experimental Brain Metastasis of Breast Cancer (Intraventricular Mouse Model): Experimental method**

- ✓ Breast cancer cells ; MDA-MB-361-luc-BR2, -BR3 (luciferase expressing cell lines)
- ↓
- ✓ Left ventricle injection into immune-compromised mouse (n = 20 for each implantation model)
- ↓
- ✓ Tumor cell growth in brain for 6 weeks
- ↓
- ✓ Group assignment and administration of epertinib or lapatinib
- ↓ 4 h
- ✓ I.v. injection of Texas-Red dextran (3 kDa)
- ↓ 5 min
- ✓ Study barrier permeability and drug uptake

**Group assignment**

| Substance | Dose (mg/kg) | Clone name |     |
|-----------|--------------|------------|-----|
|           |              | BR2        | BR3 |
| Epertinib | 50           | n=3        | n=3 |
| Lapatinib | 50           | n=3        | n=2 |

## Supplementary Figure S2. Distribution of epertinib and lapatinib in brain metastases of the breast cancer IVM

Representative images of mouse brain sections showing BR2 IVM with breast cancer with at 4 h after oral administration of epertinib hydrochloride or lapatinib ditosylate monohydrate at a dose of 50 mg/kg (as epertinib (**A**) or lapatinib (**B**)). The magnified views are shown in upper row: H&E images, middle row: ion images of epertinib or lapatinib, and lower row: ion images of epertinib or lapatinib co-registered with H&E. Typical images of mouse brain sections showing diamidino phenylindole fluorescence (**C**), Texas-Red<sup>®</sup> dextran (3 kDa) fluorescence (**D**), and HER2 IHC staining (**E**) from an animal with BR2 brain metastases. Arrows indicate the position of tumors and the position of choroid plexus. Dashed lines of black and yellow: the region of tumors (**A** and **B**), white: the region of brain parenchyma (**D**).

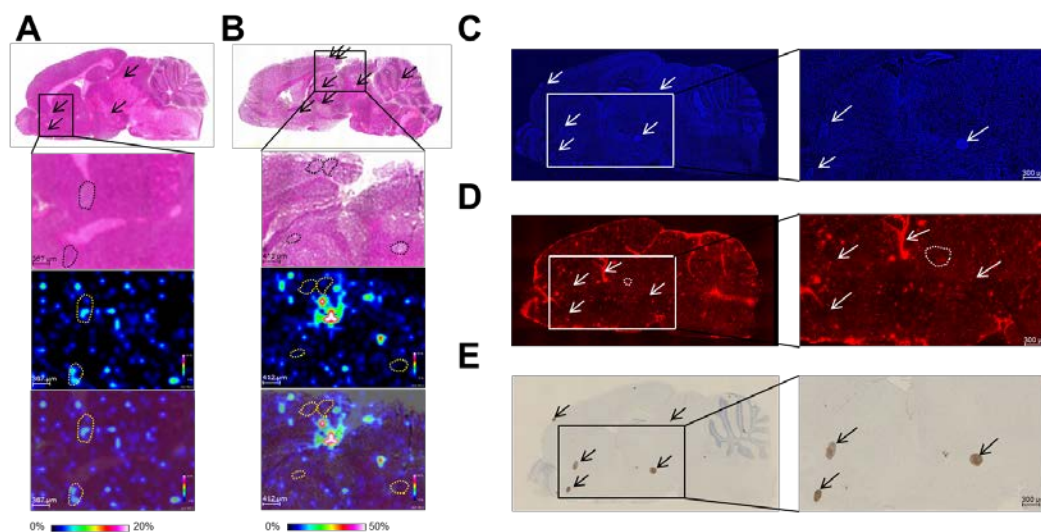

**Supplementary Figure S3. Concentration of radioactivity and epertinib in plasma after single oral administration of [<sup>14</sup>C]-epertinib hydrochloride to non-fasting male rats (dose: 5 mg as epertinib/kg)**

Data are expressed as the mean values + SD of four animals.

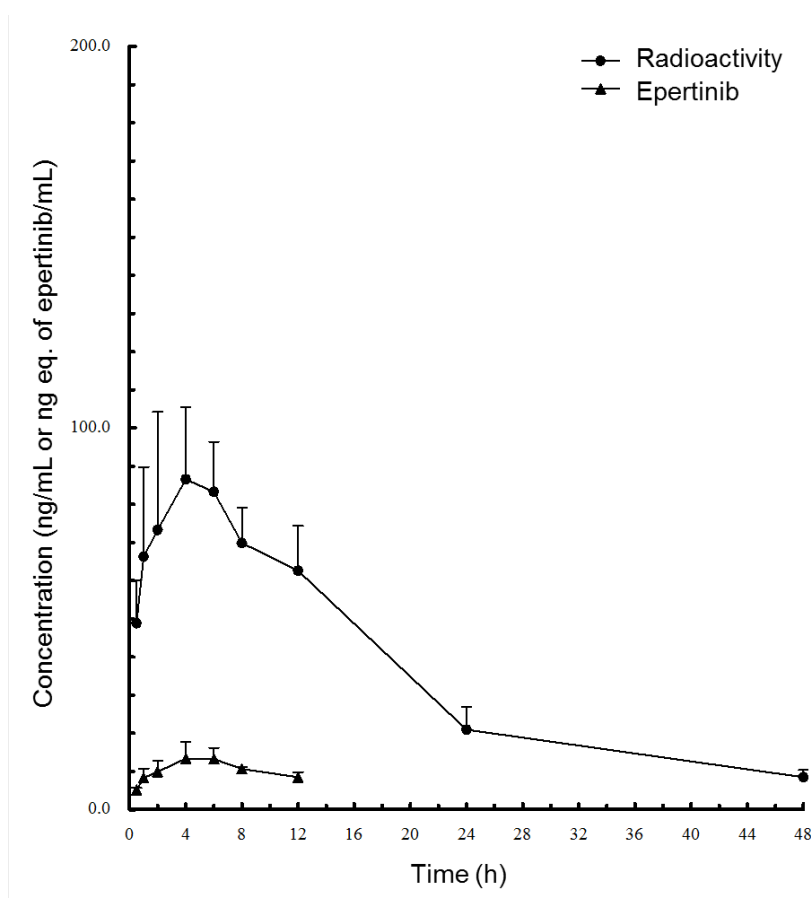

# Supplementary Figure S4. Representative calibration curves of epertinib and lapatinib measured by IMS

Representative data for calibration curves of epertinib (A) and lapaitnib (B)

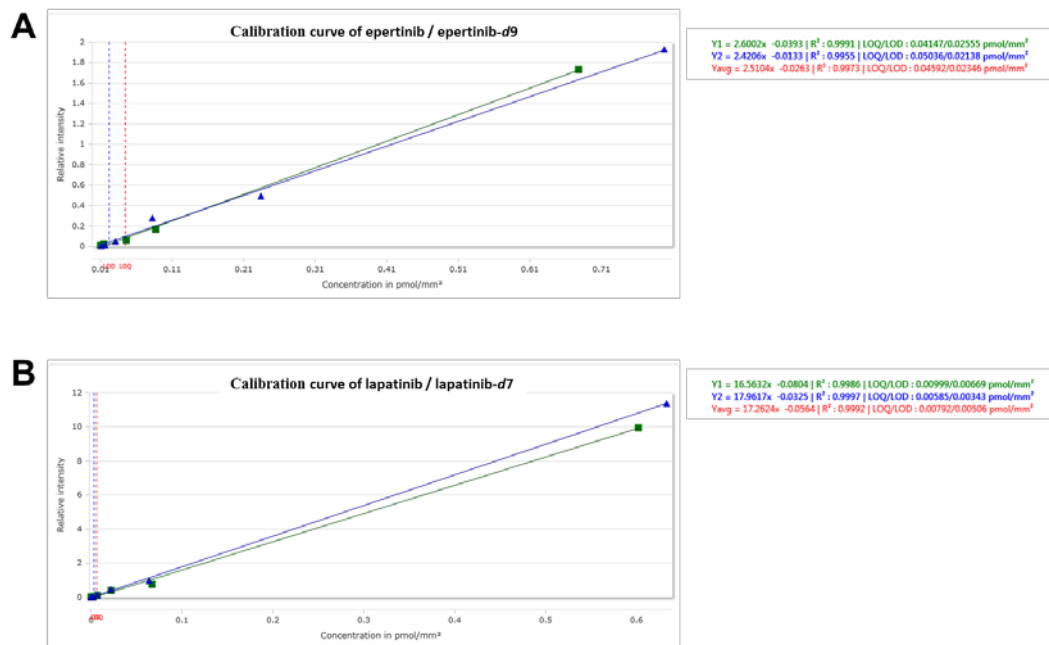

Supplement: 41598_2017_18702_MOESM1_ESM.pdf [file 41598_2017_18702_MOESM1_ESM.pdf]
